# Supplementary material for: Integrative Genomic and Machine Learning Approaches Reveal Evolutionary Signatures in the Winged Bean Mitochondrial Genome
Source: Research Square preprint supplement (doi:10.21203/rs.3.rs-7571989/v1), 2025-10-03
Supplement: Supplementary file 1 [file 45aa25f812130ea88e051347.xlsx]

## Sheet: Table 3
Table 3: Comparative performance of machine learning classifiers for chloroplast vs. mitochondrial gene classification based on codon usage features
Model	ROC (Mean)	Accuracy (Mean)	Kappa (Mean)	Sensitivity (Mean)	Specificity (Mean)
rf	0.9606	0.931	0.7976	0.9818	0.7333
svmRadial	0.9558	0.9099	0.7522	0.9727	0.7167
gbm	0.9311	0.898	0.7153	0.9527	0.7167
xgbTree	0.9599	0.9237	0.7915	0.9427	0.6833
nnet	0.9433	0.9303	0.8181	0.9055	0.85
nb	0.889	0.8731	0.6521	0.9	0.8167
