# Supplementary material for: Integrative Genomic and Machine Learning Approaches Reveal Evolutionary Signatures in the Winged Bean Mitochondrial Genome
Source: Research Square preprint supplement (doi:10.21203/rs.3.rs-7571989/v1), 2025-10-03
Supplement: Supplementary file 3 [file c0974b1c912dbc95379bee05.xlsx]

## Sheet: Supp Table S4
gene	T3s	C3s	A3s	G3s	CAI	CBI	Fop	Nc	GC3s	GC	L_sym	L_aa	Gravy	Aromo	Organelle
rps19_1	0.4118	0	0.6667	0.1765	0.105	-0.178	0.273		0.136	0.242	22	22	-0.427273	0.045455	chloroplast
rpl2_2	0.1939	0.2551	0.3942	0.4167	0.147	0.004	0.392	61	0.52	0.474	125	128	-0.285156	0.054688	chloroplast
rpl2_2	0.4	0.187	0.4587	0.1684	0.144	-0.107	0.354	50.65	0.284	0.428	268	274	-0.571898	0.047445	chloroplast
rpl2_2	0.4286	0.2143	0.4479	0.1605	0.15	-0.085	0.375	58.7	0.289	0.405	128	130	-0.655385	0.069231	chloroplast
rpl23_2	0.4521	0.1233	0.4928	0.1803	0.123	-0.247	0.264	54.54	0.23	0.358	87	93	-0.427957	0.096774	chloroplast
ycf2_1	0.4557	0.2033	0.406	0.2538	0.159	-0.144	0.335	52.61	0.33	0.367	2197	2289	-0.383137	0.131062	chloroplast
ndhB_2	0.4484	0.1883	0.4263	0.1	0.153	-0.062	0.364	47.73	0.243	0.372	239	251	0.691235	0.115538	chloroplast
ndhB_2	0.4409	0.2023	0.4358	0.1206	0.162	-0.087	0.355	47.85	0.262	0.366	484	509	0.648919	0.125737	chloroplast
ndhB_2	0.4332	0.2166	0.4457	0.1419	0.17	-0.111	0.347	48.93	0.282	0.36	245	258	0.607752	0.135659	chloroplast
rps7_2	0.4	0.1583	0.5194	0.1261	0.186	-0.051	0.389	48.8	0.228	0.415	149	155	-0.579355	0.045161	chloroplast
rps12_1	0.4	0.2	0.6	0.2	0.119	-0.333	0.286		0.286	0.375	7	8	-1.9125	0	chloroplast
rps12_1	0.402	0.1961	0.4519	0.1327	0.145	-0.077	0.355	41.6	0.273	0.436	121	123	-0.637398	0.04065	chloroplast
rps12_1	0.4328	0.194	0.4394	0.0984	0.15	-0.079	0.351	36.9	0.247	0.424	77	77	-0.345455	0.038961	chloroplast
rrna-blatn_rrn16_2	0.2278	0.281	0.3071	0.3385	0.15	-0.048	0.394	58.63	0.533	0.577	452	474	-0.515401	0.056962	chloroplast
rrna-blatn_rrn23_2	0.2558	0.2944	0.2991	0.3397	0.137	-0.028	0.401	58.63	0.53	0.559	872	899	-0.849166	0.053393	chloroplast
rrna-blatn_rrn4.5_2	0.24	0.44	0.2609	0.2857	0.246	0.143	0.517	41.6	0.586	0.533	29	30	-0.296667	0.066667	chloroplast
rrna-blatn_rrn5_2	0.2353	0.3529	0.3125	0.3226	0.252	0.164	0.5		0.55	0.533	40	40	-0.19	0.05	chloroplast
ndhF_1	0.5596	0.0956	0.4391	0.1435	0.153	-0.2	0.288	42	0.175	0.303	708	746	0.614611	0.160858	chloroplast
rpl32_1	0.5	0.1316	0.4872	0.1944	0.24	-0.018	0.44	45.02	0.24	0.308	50	53	-0.733962	0.150943	chloroplast
ccsA_1	0.5299	0.0821	0.5244	0.1087	0.131	-0.24	0.268	37.69	0.139	0.276	302	324	0.512654	0.169753	chloroplast
ndhD_1	0.4965	0.2599	0.2954	0.2193	0.178	-0.123	0.366	54	0.353	0.338	459	476	0.02374	0.235294	chloroplast
psaC_1	0.4697	0.1667	0.5	0.1154	0.174	-0.2	0.316	45.27	0.224	0.416	76	81	-0.076543	0.074074	chloroplast
ndhE_1	0.5333	0.1333	0.36	0.1774	0.147	-0.15	0.316	48.63	0.235	0.337	98	101	0.70693	0.09901	chloroplast
ndhG_1	0.5316	0.0633	0.4286	0.1622	0.113	-0.288	0.207	43.53	0.166	0.328	169	176	1.12955	0.119318	chloroplast
ndhI_1	0.5333	0.1407	0.4865	0.1319	0.175	-0.165	0.318	46.36	0.197	0.342	157	162	0.034568	0.117284	chloroplast
ndhA_1	0.5102	0.2653	0.3137	0.1829	0.198	-0.073	0.385	43.91	0.335	0.32	161	170	0.35	0.241176	chloroplast
ndhA_1	0.4858	0.1041	0.4769	0.133	0.14	-0.124	0.321	40.77	0.182	0.322	352	363	0.749587	0.14876	chloroplast
ndhA_1	0.4907	0.087	0.4863	0.1217	0.12	-0.22	0.264	43.68	0.157	0.328	178	183	0.846995	0.125683	chloroplast
ndhH_1	0.495	0.1221	0.4947	0.1639	0.162	-0.099	0.349	48.52	0.21	0.367	367	393	-0.152163	0.122137	chloroplast
rps15_1	0.4328	0.0597	0.5972	0.2031	0.15	-0.067	0.371	42.47	0.191	0.307	89	90	-0.704444	0.1	chloroplast
ycf1_1	0.5112	0.1297	0.5883	0.146	0.161	-0.152	0.338	44.04	0.188	0.261	1705	1753	-0.524301	0.138049	chloroplast
rrna-blatn_rrn5_1	0.2353	0.3529	0.3125	0.3226	0.252	0.164	0.5		0.55	0.533	40	40	-0.19	0.05	chloroplast
rrna-blatn_rrn4.5_1	0.24	0.44	0.2609	0.2857	0.246	0.143	0.517	41.6	0.586	0.533	29	30	-0.296667	0.066667	chloroplast
rrna-blatn_rrn23_1	0.2558	0.2944	0.2991	0.3397	0.137	-0.028	0.401	58.63	0.53	0.559	872	899	-0.849166	0.053393	chloroplast
rrna-blatn_rrn16_1	0.2278	0.281	0.3071	0.3385	0.15	-0.048	0.394	58.63	0.533	0.577	452	474	-0.515401	0.056962	chloroplast
rps7_1	0.4	0.1583	0.5194	0.1261	0.186	-0.051	0.389	48.8	0.228	0.415	149	155	-0.579355	0.045161	chloroplast
ndhB_1	0.4332	0.2166	0.4457	0.1419	0.17	-0.111	0.347	48.93	0.282	0.36	245	258	0.607752	0.135659	chloroplast
ndhB_1	0.4409	0.2023	0.4358	0.1206	0.162	-0.087	0.355	47.85	0.262	0.366	484	509	0.648919	0.125737	chloroplast
ndhB_1	0.4484	0.1883	0.4263	0.1	0.153	-0.062	0.364	47.73	0.243	0.372	239	251	0.691235	0.115538	chloroplast
ycf2_2	0.4557	0.2033	0.406	0.2538	0.159	-0.144	0.335	52.61	0.33	0.367	2197	2289	-0.383137	0.131062	chloroplast
rpl23_1	0.4521	0.1233	0.4928	0.1803	0.123	-0.247	0.264	54.54	0.23	0.358	87	93	-0.427957	0.096774	chloroplast
rpl2_1	0.4286	0.2143	0.4479	0.1605	0.15	-0.085	0.375	58.7	0.289	0.405	128	130	-0.655385	0.069231	chloroplast
rpl2_1	0.4	0.187	0.4587	0.1684	0.144	-0.107	0.354	50.65	0.284	0.428	268	274	-0.571898	0.047445	chloroplast
rpl2_1	0.1939	0.2551	0.3942	0.4167	0.147	0.004	0.392	61	0.52	0.474	125	128	-0.285156	0.054688	chloroplast
rps19-fragment_1	0.4118	0	0.6667	0.1765	0.105	-0.178	0.273		0.136	0.242	22	22	-0.427273	0.045455	chloroplast
psbA_1	0.5789	0.1941	0.2937	0.1	0.27	0.112	0.483	39.48	0.245	0.408	331	353	0.349859	0.135977	chloroplast
matK_1	0.5385	0.1418	0.4556	0.1958	0.153	-0.196	0.294	44.93	0.233	0.283	493	503	-0.01173	0.186879	chloroplast
rbcL_1	0.5478	0.1576	0.4017	0.1257	0.261	0.061	0.459	45.61	0.225	0.42	458	474	-0.295781	0.099156	chloroplast
atpB_1	0.4717	0.1523	0.4642	0.1075	0.195	-0.038	0.388	43.75	0.212	0.407	482	498	-0.038755	0.058233	chloroplast
atpE_1	0.463	0.1019	0.4352	0.2283	0.149	-0.15	0.318	56.17	0.248	0.386	129	134	0.032836	0.022388	chloroplast
ndhC_1	0.505	0.0891	0.4828	0.1389	0.152	-0.193	0.277	47.21	0.17	0.342	112	120	1.02	0.216667	chloroplast
ndhK_1	0.4802	0.1582	0.4387	0.156	0.164	-0.16	0.33	51.85	0.246	0.384	203	212	-0.211321	0.108491	chloroplast
ndhJ_1	0.5238	0.1349	0.4685	0.1474	0.149	-0.211	0.289	44.78	0.208	0.367	149	158	-0.305696	0.14557	chloroplast
rps4_1	0.5033	0.1307	0.4691	0.1565	0.178	0.036	0.423	44.99	0.219	0.36	196	200	-0.6545	0.075	chloroplast
pafI_1	0.4595	0.1081	0.5161	0.16	0.115	-0.263	0.268	51.22	0.195	0.317	41	42	-0.330952	0.119048	chloroplast
pafI_1	0.4887	0.1654	0.4576	0.1942	0.156	-0.177	0.335	55.58	0.261	0.385	161	168	-0.519048	0.142857	chloroplast
pafI_1	0.5082	0.1803	0.4583	0.186	0.156	-0.2	0.319	46.56	0.264	0.378	72	75	-0.462667	0.146667	chloroplast
pafI_1	0.275	0.25	0.2381	0.4865	0.126	-0.016	0.367	61	0.571	0.456	49	49	-0.320408	0.020408	chloroplast
psaA_1	0.4938	0.148	0.4108	0.1558	0.18	-0.142	0.332	47.46	0.239	0.405	707	750	0.254267	0.132	chloroplast
psaB_1	0.5128	0.1518	0.3796	0.1685	0.179	-0.097	0.362	48.04	0.251	0.407	688	734	0.128747	0.149864	chloroplast
rps14_1	0.4211	0.1184	0.5125	0.1781	0.135	-0.132	0.337	47.27	0.232	0.403	95	100	-0.919	0.07	chloroplast
psbZ_1	0.625	0.0536	0.36	0.0714	0.218	-0.101	0.322	40.17	0.102	0.306	59	62	1.56613	0.129032	chloroplast
psbC_1	0.4886	0.1544	0.4006	0.1366	0.178	-0.053	0.378	46.83	0.24	0.428	437	461	0.274837	0.136659	chloroplast
psbD_1	0.51	0.2067	0.3525	0.1304	0.271	0.093	0.471	45.03	0.278	0.427	331	353	0.360623	0.169972	chloroplast
psbM_1	0.5667	0.1	0.4231	0.0952	0.232	-0.086	0.333		0.152	0.294	33	34	1.41765	0.117647	chloroplast
petN_1	0.4	0.12	0.5	0.0476	0.136	-0.149	0.28	36.95	0.16	0.402	25	29	1.55517	0.137931	chloroplast
rpoB_1	0.4708	0.1262	0.4849	0.1694	0.142	-0.132	0.336	46.51	0.223	0.37	1036	1070	-0.241589	0.085047	chloroplast
rpoC1_1	0.5046	0.1193	0.5619	0.1413	0.164	-0.202	0.3	44.28	0.186	0.343	140	144	-0.38125	0.111111	chloroplast
rpoC1_1	0.4826	0.1335	0.4971	0.16	0.151	-0.132	0.333	48.05	0.218	0.367	664	684	-0.354094	0.099415	chloroplast
rpoC1_1	0.4772	0.137	0.4804	0.1648	0.147	-0.113	0.342	48.77	0.227	0.374	524	540	-0.346852	0.096296	chloroplast
rpoC2_1	0.4706	0.1321	0.5114	0.162	0.146	-0.174	0.315	46.15	0.216	0.342	1322	1360	-0.240221	0.090441	chloroplast
rps2_1	0.5079	0.1111	0.477	0.1733	0.152	-0.239	0.283	44.84	0.208	0.356	226	236	-0.260593	0.088983	chloroplast
atpI_1	0.5236	0.1415	0.4241	0.1024	0.172	-0.037	0.368	40.58	0.197	0.347	239	247	0.79838	0.129555	chloroplast
atpH_1	0.5211	0.0141	0.3425	0.2424	0.175	-0.076	0.354	35.4	0.215	0.453	79	81	1.01111	0.049383	chloroplast
atpF_1	0.3864	0.1818	0.4545	0.2	0.131	-0.284	0.239	47.79	0.304	0.375	46	48	0.779166	0.145833	chloroplast
atpF_1	0.3857	0.1857	0.4894	0.2154	0.146	-0.125	0.339	41.82	0.305	0.375	177	182	-0.304945	0.071429	chloroplast
atpF_1	0.3854	0.1875	0.5	0.22	0.151	-0.068	0.374	44.19	0.305	0.376	131	134	-0.693283	0.044776	chloroplast
atpA_1	0.4837	0.1328	0.447	0.1521	0.2	-0.038	0.393	45.31	0.224	0.395	499	510	-0.041569	0.058824	chloroplast
psbI_1	0.3438	0.2812	0.48	0.1304	0.213	0.203	0.514	28.59	0.343	0.398	35	36	0.677778	0.194444	chloroplast
psbK_1	0.5273	0.2	0.2857	0.1667	0.15	-0.262	0.224	49.27	0.293	0.361	58	61	1.37377	0.180328	chloroplast
rps16_1	0.4286	0	0.5	0.3	0.172	-0.037	0.364		0.273	0.361	11	12	-0.733333	0	chloroplast
rps16_1	0.5294	0.1176	0.4697	0.1803	0.163	-0.174	0.314	47.19	0.221	0.371	86	88	-0.463636	0.090909	chloroplast
rps16_1	0.541	0.1311	0.4643	0.1569	0.162	-0.195	0.307	44.23	0.213	0.373	75	76	-0.421053	0.105263	chloroplast
accD_1	0.5949	0.141	0.4118	0.1614	0.201	-0.172	0.337	44.07	0.217	0.322	466	486	-0.4107	0.115226	chloroplast
psaI_1	0.5172	0.1379	0.4	0.15	0.153	-0.119	0.312	46.5	0.219	0.314	32	34	1.15	0.117647	chloroplast
pafII_1	0.4714	0.1786	0.3689	0.2688	0.146	-0.169	0.331	55.81	0.325	0.366	154	163	-0.252761	0.233129	chloroplast
cemA_1	0.5622	0.1514	0.4551	0.127	0.177	-0.116	0.342	38.95	0.201	0.278	219	229	0.316157	0.148472	chloroplast
petA_1	0.5253	0.1323	0.3725	0.2329	0.181	-0.103	0.346	47.44	0.27	0.386	315	320	-0.055625	0.078125	chloroplast
psbJ_1	0.4737	0.1579	0.2727	0.2	0.161	-0.107	0.342	40.42	0.289	0.4	38	40	1.165	0.125	chloroplast
psbL_1	0.4545	0.2121	0.48	0.125	0.16	-0.128	0.324	42.3	0.27	0.316	37	38	0.189474	0.184211	chloroplast
psbF_1	0.2941	0.1471	0.5667	0.1538	0.109	-0.246	0.25	54	0.25	0.41	36	39	0.646154	0.128205	chloroplast
psbE_1	0.4795	0.2329	0.381	0.0755	0.174	-0.105	0.363	51.78	0.263	0.402	80	83	0.060241	0.156627	chloroplast
petL_1	0.5172	0.1379	0.3462	0.1	0.125	0.036	0.4	50.25	0.2	0.312	30	31	1.65484	0.129032	chloroplast
petG_1	0.4545	0.0303	0.5517	0.16	0.089	-0.279	0.194	27.37	0.139	0.324	36	37	1.11351	0.135135	chloroplast
psaJ_1	0.375	0.15	0.4516	0.2593	0.12	-0.251	0.238	51.56	0.31	0.394	42	44	0.981818	0.204545	chloroplast
rpl33_1	0.551	0.1224	0.3922	0.2727	0.196	-0.111	0.369	36	0.277	0.354	65	66	-0.707576	0.030303	chloroplast
rps18_1	0.4615	0.1538	0.4767	0.1558	0.135	-0.06	0.376	35.29	0.238	0.333	101	103	-0.802913	0.07767	chloroplast
rpl20_1	0.4717	0.1132	0.51	0.1566	0.104	-0.191	0.302	48.81	0.198	0.328	126	129	-0.504651	0.085271	chloroplast
rps12_1	0.3548	0.1935	0.4516	0.1667	0.117	-0.053	0.361	29.36	0.306	0.474	36	38	-0.913158	0.026316	chloroplast
clpP1_1	0.3818	0.2	0.459	0.1964	0.254	0.088	0.465	41.85	0.31	0.431	71	75	0.001333	0.08	chloroplast
clpP1_1	0.4416	0.1429	0.5	0.1481	0.177	-0.075	0.362	49.24	0.227	0.4	185	196	0.093367	0.096939	chloroplast
clpP1_1	0.4337	0.2048	0.3385	0.2414	0.118	-0.216	0.315	50.62	0.348	0.377	89	91	-0.667033	0.186813	chloroplast
clpP1_1	0.5	0.1667	0.4444	0.0625	0.184	-0.02	0.381		0.19	0.449	21	23	-0.173913	0.086957	chloroplast
psbB_1	0.5183	0.1422	0.3984	0.1353	0.191	-0.06	0.38	45.49	0.225	0.425	481	508	0.135039	0.145669	chloroplast
psbT_1	0.4444	0.1852	0.4074	0.2083	0.203	0	0.394	52.21	0.303	0.333	33	35	0.748571	0.171429	chloroplast
pbf1_1	0.4444	0.1944	0.4706	0.0968	0.17	-0.121	0.357	41.17	0.238	0.411	42	43	0.118605	0.116279	chloroplast
psbH_1	0.541	0.0328	0.3793	0.2115	0.16	-0.055	0.368	42.12	0.191	0.374	68	73	0.312329	0.068493	chloroplast
petB_1	0.4415	0.2713	0.2797	0.2692	0.168	-0.139	0.349	53.21	0.405	0.391	195	203	0.090148	0.192118	chloroplast
petD_1	0.3363	0.2832	0.3523	0.3846	0.172	-0.028	0.374	55.21	0.473	0.402	131	140	0.304286	0.242857	chloroplast
rpoA_1	0.4886	0.1515	0.5228	0.1429	0.156	-0.165	0.315	45.79	0.213	0.324	324	332	-0.185542	0.087349	chloroplast
rps11_1	0.4444	0.1453	0.4298	0.1471	0.135	-0.155	0.331	55.29	0.241	0.449	133	138	-0.473188	0.036232	chloroplast
rpl36_1	0.4138	0.069	0.6129	0.12	0.081	-0.251	0.25		0.139	0.351	36	37	-0.727027	0	chloroplast
rps8_1	0.4167	0.1944	0.52	0.1205	0.132	-0.039	0.391	39.11	0.242	0.336	128	134	-0.335821	0.097015	chloroplast
rpl14_1	0.451	0.1569	0.5052	0.1111	0.188	-0.054	0.375	44.82	0.208	0.372	120	122	0.036065	0.040984	chloroplast
rpl16_1	0.3084	0.3084	0.2667	0.3924	0.127	-0.144	0.364	44.2	0.529	0.434	121	123	-0.902439	0.097561	chloroplast
rps3_1	0.4841	0.121	0.5581	0.1295	0.158	-0.099	0.364	48.02	0.177	0.313	209	216	-0.270833	0.078704	chloroplast
rpl22_1	0.5385	0.1538	0.75	0.1667	0.221	-0.258	0.35		0.2	0.258	20	22	-1.77273	0.227273	chloroplast
rps19_1	0.4167	0.2167	0.5294	0.0488	0.152	-0.043	0.403	45.17	0.224	0.367	67	70	-0.628571	0.057143	chloroplast
atp9	0.3538	0.2	0.4407	0.1509	0.21	-0.08	0.371	45.54	0.3	0.428	70	74	1.25	0.108108	mitochondrion
rps12	0.3762	0.1287	0.4757	0.2421	0.137	-0.088	0.358	46.8	0.293	0.443	123	125	-1.1304	0.016	mitochondrion
atp4	0.3725	0.2222	0.3836	0.2587	0.162	-0.037	0.381	61	0.376	0.419	189	195	-0.097436	0.046154	mitochondrion
nad2	0.4805	0.2143	0.3095	0.2091	0.185	-0.156	0.32	54.35	0.331	0.375	169	176	0.53125	0.142045	mitochondrion
nad4	0.4504	0.2567	0.2938	0.2215	0.187	-0.108	0.359	55.48	0.376	0.418	457	482	0.09668	0.165975	mitochondrion
rps10	0.3143	0.2095	0.453	0.2857	0.13	-0.104	0.341	53.19	0.377	0.395	138	140	-0.565	0.078571	mitochondrion
cox3	0.4716	0.1878	0.3418	0.1771	0.2	-0.084	0.357	52.07	0.297	0.434	249	265	0.554717	0.158491	mitochondrion
cox1	0.4064	0.2298	0.3464	0.1805	0.181	-0.041	0.381	55.11	0.343	0.436	493	527	0.604554	0.136622	mitochondrion
nad3	0.5146	0.1942	0.2706	0.2133	0.178	-0.141	0.312	52	0.321	0.407	112	118	0.459322	0.169492	mitochondrion
matR	0.2208	0.3932	0.3125	0.3032	0.149	0.001	0.412	57.38	0.558	0.518	651	667	-0.308846	0.088456	mitochondrion
nad4L	0.4886	0.1591	0.3247	0.1935	0.18	-0.112	0.34	45.54	0.277	0.373	94	100	0.832	0.08	mitochondrion
nad1	0.4886	0.0795	0.3766	0.2113	0.129	-0.244	0.245	44.62	0.234	0.401	94	99	0.683838	0.111111	mitochondrion
rpl5	0.3264	0.2431	0.437	0.2984	0.186	-0.055	0.393	58.47	0.404	0.434	178	185	-0.47946	0.097297	mitochondrion
rp15_1	0.3264	0.2431	0.437	0.2984	0.186	-0.055	0.393	58.47	0.404	0.434	178	185	-0.47946	0.097297	mitochondrion
ccmF	0.4138	0.2373	0.3063	0.2382	0.169	-0.023	0.393	57.1	0.388	0.471	549	578	-0.050346	0.117647	mitochondrion
ccmC	0.4444	0.1898	0.3316	0.1782	0.161	-0.01	0.382	48.64	0.309	0.427	233	245	0.421225	0.106122	mitochondrion
cob	0.3127	0.3029	0.3156	0.3223	0.173	0.019	0.395	58.34	0.482	0.434	334	356	0.895786	0.185393	mitochondrion
nad9	0.451	0.2092	0.4161	0.186	0.194	-0.049	0.385	60.04	0.308	0.419	182	190	-0.712632	0.126316	mitochondrion
mttB	0.3905	0.2381	0.3081	0.2654	0.175	-0.018	0.379	54.93	0.401	0.431	232	240	0.571667	0.141667	mitochondrion
ccmFc	0.3786	0.2533	0.3363	0.2548	0.144	-0.095	0.349	57.9	0.406	0.453	436	455	-0.166813	0.098901	mitochondrion
nad4L	0.4886	0.1591	0.3247	0.1935	0.18	-0.112	0.34	45.54	0.277	0.373	94	100	0.832	0.08	mitochondrion
rpl16	0.4234	0.1387	0.4265	0.2266	0.161	-0.086	0.378	56.97	0.293	0.446	164	171	-0.449123	0.087719	mitochondrion
ccmB	0.4536	0.2131	0.3312	0.1888	0.163	-0.072	0.351	53.53	0.327	0.412	202	208	0.292308	0.120192	mitochondrion
atp1	0.385	0.2252	0.4296	0.1728	0.175	-0.074	0.367	52.18	0.319	0.44	498	508	-0.029331	0.062992	mitochondrion
atp1	0.385	0.2252	0.4296	0.1728	0.175	-0.074	0.367	52.18	0.319	0.44	498	508	-0.029331	0.062992	mitochondrion
rps3	0.3356	0.2644	0.3803	0.2935	0.158	-0.056	0.387	59.49	0.426	0.433	545	561	-0.580571	0.110517	mitochondrion
rps14	0.4512	0.1829	0.3289	0.2676	0.131	-0.142	0.323	52.28	0.354	0.427	96	100	-0.832	0.1	mitochondrion
rps1	0.3253	0.241	0.4136	0.2603	0.15	-0.139	0.327	50.28	0.392	0.423	199	205	-0.271707	0.082927	mitochondrion
nad6	0.3822	0.2251	0.3491	0.2245	0.152	0.006	0.385	53.48	0.365	0.409	208	221	0.669231	0.108597	mitochondrion
atp6	0.5124	0.2587	0.2517	0.2101	0.186	-0.113	0.36	50.13	0.365	0.388	222	227	-0.042291	0.211454	mitochondrion
ccmF	0.3359	0.3282	0.2883	0.2621	0.197	0.141	0.479	58.45	0.479	0.482	146	152	0.39079	0.164474	mitochondrion
rps4	0.3566	0.2442	0.438	0.2294	0.142	-0.017	0.399	54.24	0.363	0.4	311	318	-0.838679	0.084906	mitochondrion
nad7	0.4194	0.1774	0.4397	0.2	0.169	-0.12	0.345	48.61	0.297	0.442	293	308	-0.473377	0.071429	mitochondrion
nad5	0.4556	0.2126	0.3181	0.1789	0.17	-0.115	0.344	55.16	0.325	0.419	453	482	0.713071	0.143154	mitochondrion
sdh4	0.4464	0.1429	0.3556	0.3	0.122	-0.33	0.213	51.29	0.328	0.385	61	65	0.503077	0.123077	mitochondrion
sdh3	0.36	0.36	0.5556	0.0556	0.225	-0.005	0.448	33.3	0.345	0.414	29	33	-0.927273	0.181818	mitochondrion
