# Supplementary material for: Integrative Genomic and Machine Learning Approaches Reveal Evolutionary Signatures in the Winged Bean Mitochondrial Genome
Source: Research Square preprint supplement (doi:10.21203/rs.3.rs-7571989/v1), 2025-10-03
Supplement: Supplementary file 5 [file d5d2d02a391f34fabd15faf3.xlsx]

## Sheet: Significant_Positive_Selection_
Table 2: Summary of significant positively selected sites detected across mitochondrial genes of Psophocarpus tetragonolobus using the M8 model in codeml (PAML package). Codon positions, corresponding amino acids, posterior probability of ω > 1, and significance levels are shown. Sites with a posterior probability >95% are marked with a single asterisk (*), and those >99% are marked with a double…
Gene	Codon	Amino Acid	P(ω >1)	Significance	ω Mean	ω SE
atp4	43	T	0.998	**	8.934	1.31
atp4	141	K	0.998	**	8.93	1.322
atp4	143	Y	0.988	*	8.851	1.534
atp4	144	T	0.999	**	8.939	1.296
atp4	148	N	0.989	*	8.857	1.522
atp4	151	A	1	**	8.948	1.268
atp4	153	S	1	**	8.947	1.27
atp4	180	S	0.978	*	8.761	1.742
ccmB	7	E	0.998	**	6.912	2.099
ccmB	11	L	0.984	*	6.826	2.199
ccmB	23	P	0.973	*	6.749	2.27
ccmFc	19	H	0.963	*	2.653	0.801
ccmFc	65	L	0.96	*	2.645	0.801
ccmFc	78	R	0.989	*	2.71	0.754
cob	5	F	0.974	*	4.291	1.505
cob	358	L	0.996	**	4.36	1.421
cox1	220	L	0.974	*	3.253	1.069
cox3	53	L	0.988	*	6.422	2.012
cox3	125	G	0.988	*	6.416	2.018
cox3	130	W	0.991	**	6.434	1.997
cox3	255	L	0.983	*	6.391	2.048
nad4	7	N	0.983	*	3.531	0.821
nad4	15	C	0.964	*	3.47	0.905
nad4	19	L	0.997	**	3.573	0.761
nad4	33	V	0.979	*	3.519	0.838
nad4	48	P	0.962	*	3.46	0.906
nad4	56	Y	0.972	*	3.495	0.866
nad4	66	H	0.97	*	3.489	0.875
nad4	82	F	0.963	*	3.465	0.9
nad4	84	S	0.97	*	3.489	0.881
nad4	89	P	0.984	*	3.533	0.822
nad4	101	A	0.97	*	3.489	0.877
nad4	212	T	0.971	*	3.493	0.871
nad4	279	Q	0.962	*	3.462	0.909
nad4	285	Y	0.975	*	3.506	0.854
nad4	291	P	0.989	*	3.549	0.795
nad4	317	L	0.991	**	3.557	0.787
nad4	324	Y	0.993	**	3.562	0.778
nad4	352	K	0.95	*	3.427	0.954
nad4	355	T	0.961	*	3.459	0.909
nad5	15	V	0.965	*	5.364	1.578
nad5	454	S	0.988	*	5.472	1.41
nad9	20	K	0.998	**	6.417	2.274
rpl16	140	W	0.958	*	4.987	2.765
rpl5	99	N	0.954	*	2.845	1.341
rps10	56	T	0.957	*	6.466	2.447
rps10	71	L	0.994	**	6.697	2.217
rps10	78	Y	0.95	*	6.422	2.482
rps10	87	F	0.962	*	6.502	2.418
rps12	79	Q	0.988	*	5.518	1.963
rps1	22	L	0.968	*	5.435	1.571
rps1	24	L	0.987	*	5.532	1.447
rps1	30	L	0.987	*	5.531	1.447
rps1	98	E	0.999	**	5.593	1.357
rps1	118	R	0.989	*	5.545	1.43
rps1	121	D	0.964	*	5.404	1.585
rps1	131	K	0.984	*	5.514	1.467
sdh4	38	L	0.962	*	6.545	2.706
